# Supplementary material for: Binary Ce–Mn oxides confined in carbon nanotubes as efficient catalysts for ethylbenzene dehydrogenation in the presence of carbon dioxide
Source: Royal Society of Chemistry journal article supplement (doi:10.1039/c5ra02048d), 2015-01-01
Supplement: c5ra02048d1.pdf [file c5ra02048d1.pdf]

Supplementary materials for the manuscript

**Binary Ce-Mn oxides confined in carbon nanotube as efficient catalysts for ethylbenzene dehydrogenation in the presence of carbon dioxide**

Changshun Li, Yufeng Sun, Aimin Zhang\*

School of Chemistry and Chemical Engineering, Key Laboratory of Mesoscopic Chemistry of MOE, Nanjing University, Nanjing 210093, PR China

\*Corresponding author Tel : +86 25 83686235 ; Fax : +86 25 83317761 E-mail: zhangam@nju.edu.cn

**Index:**

Figure S1. TEM images of the raw CNTs (A, A'), CNTs treated by HNO<sub>3</sub> (68%) (B, B') and CNTs treated by diluted HNO<sub>3</sub> (37.5%) (C, C')

Figure S2. TEM images of Ce-in-CNTs (A), Mn-in-CNTs (B) and CeMn-in-CNTs-0.375 (C)

Figure S3. EDS spectrum of CeMn-in-CNTs-0.375

Table S1. Composition analysis of prepared samples

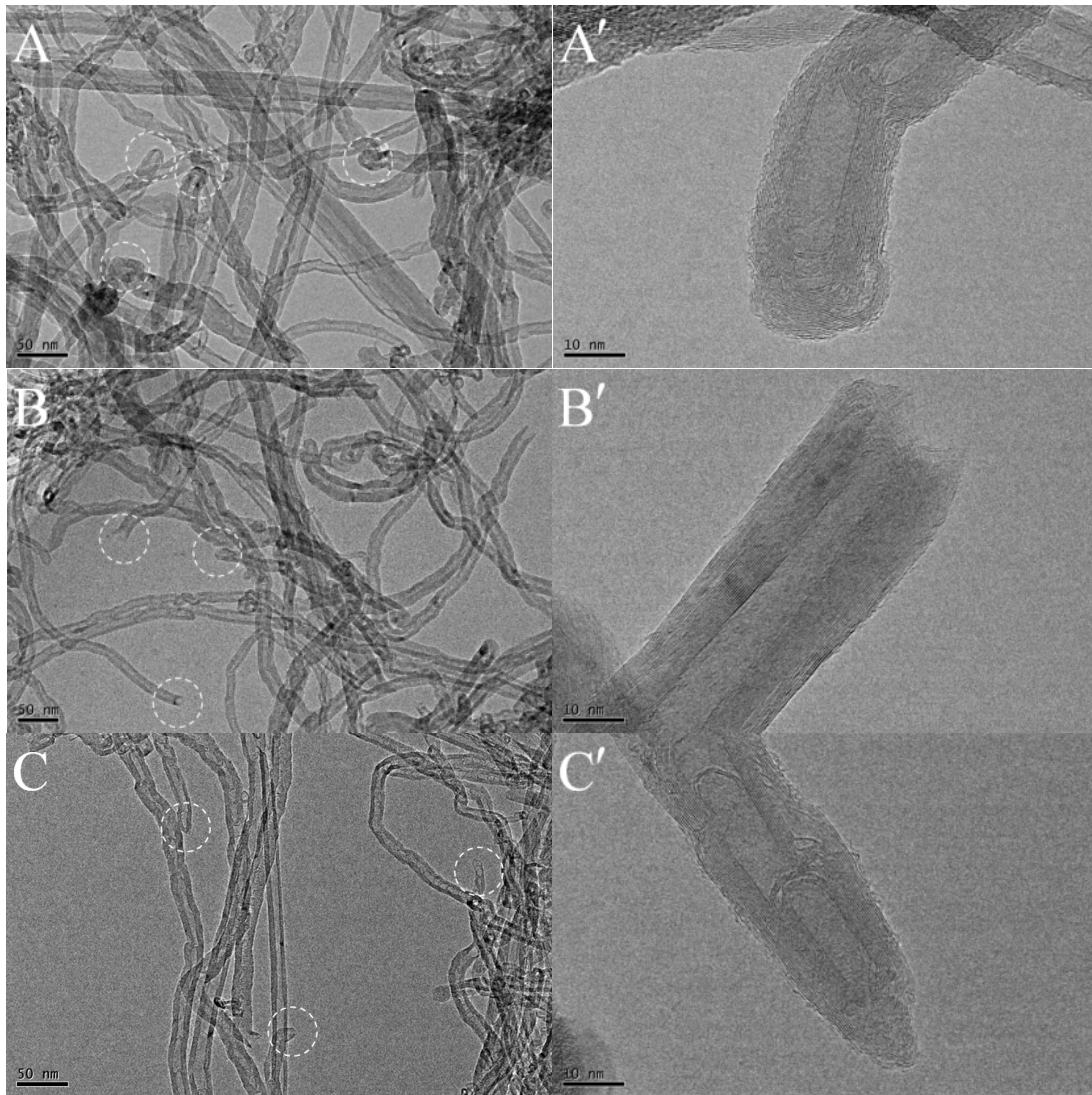

**Figure S1.** TEM images of the raw CNTs (A, A'), CNTs treated by HNO<sub>3</sub> (68%) (B, B') and CNTs treated by diluted HNO<sub>3</sub> (37.5%) (C, C'). The ends of the CNTs are indicated by dotted circle.

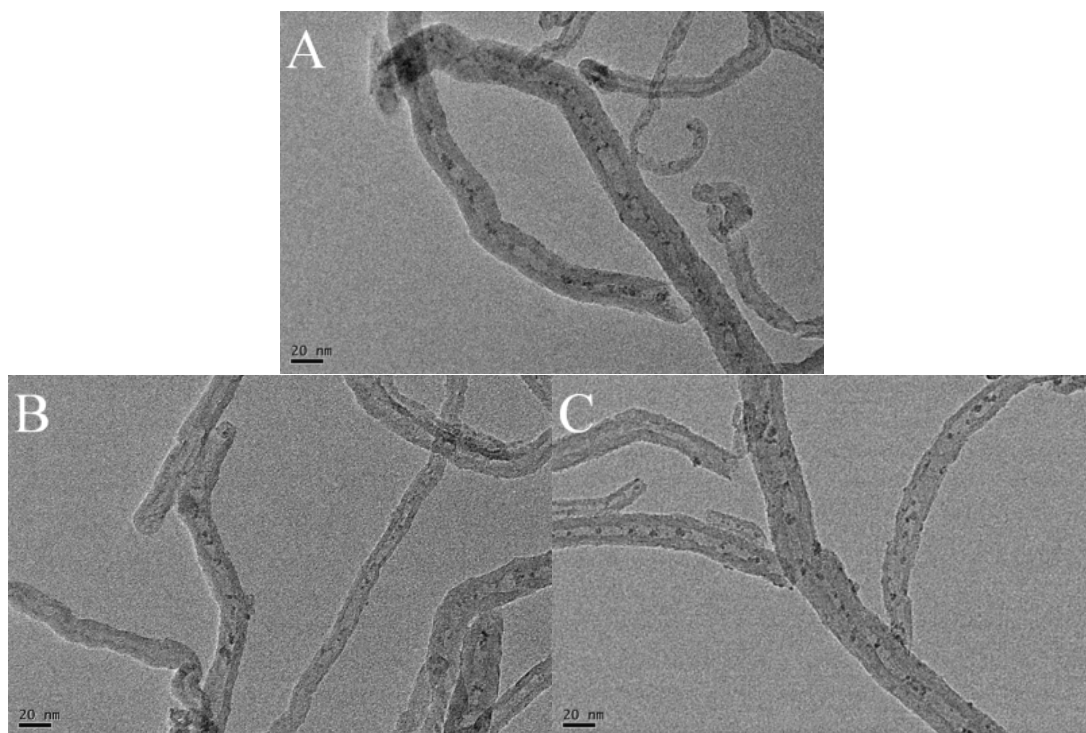

**Figure S2.** TEM images of Ce-in-CNTs (A), Mn-in-CNTs (B) and CeMn-in-CNTs-0.375 (C)

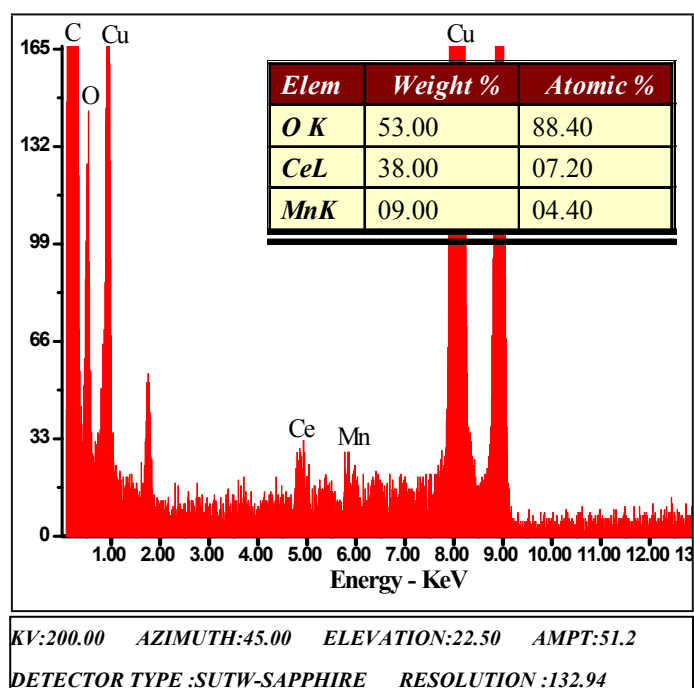

**Figure S3.** EDS spectrum of CeMn-in-CNTs-0.375. The inset shows the weight and atom percent of the various elements.

**Table S1.** Composition analysis of prepared samples

| Samples                      | Ce loading<br>(wt.%) <sup>b</sup> | Mn loading<br>(wt.%) | Atom ratio of<br>Mn/(Ce+Mn) |
|------------------------------|-----------------------------------|----------------------|-----------------------------|
| (7%) <sup>a</sup> Ce-in-CNTs | 7.1                               | —                    | —                           |
| (5%) CeMn-in-CNTs-0.375      | 4.0                               | 1.0                  | 0.39                        |
| (7%) CeMn-in-CNTs-0.375      | 5.5                               | 1.4                  | 0.393 (0.378) <sup>c</sup>  |
| (9%) CeMn-in-CNTs-0.375      | 7                                 | 1.7                  | 0.383                       |
| (7%) Mn-in-CNTs              | —                                 | 6.8                  | —                           |

<sup>a</sup> Total loading amount. <sup>b</sup> Mass fraction is analyzed by ICP-AES. <sup>c</sup> The ratio of Mn/Ce is analyzed by EDS.
